# Supplementary material for: Long-Term Evaluation of the Shape of the Reconstructed Diaphragm in Patients with Left-Sided Congenital Diaphragmatic Hernia Using Serial Chest Radiographs and Correlation to Further Complications
Source: MDPI journal article supplement (doi:10.3390/jcm13020620), 2024-01-22
Supplement: s1 [file s1]

|             |                           | 6 ± 2<br>months<br>(19,9,10) | 12 ± 2<br>months<br>(22,13,10) | 24 ± 4<br>months<br>(23,18,10) | 3.5 ± 0.5<br>years<br>(20,7,10) | 6 ± 1<br>year<br>(34,20,10) | 10 ± 2<br>years<br>(27,9,10) | 15.5 ± 2.5<br>years<br>(19,2,10) |
|-------------|---------------------------|------------------------------|--------------------------------|--------------------------------|---------------------------------|-----------------------------|------------------------------|----------------------------------|
| LDA<br>(°)  | large defects             | 28                           | 28                             | 28                             | 29                              | 28                          | 30                           | 32                               |
|             | small defects             | 36                           | 35                             | 35                             | 34                              | 34                          | 36                           | 38                               |
|             | controls                  | 46                           | 42                             | 43                             | 41                              | 41                          | 41                           | 39                               |
|             | <i>large vs. small</i>    | 0.056                        | <b>0.008</b>                   | <b>0.002</b>                   | <i>n.s.</i>                     | <b>0.001</b>                | 0.075                        | <i>n.s.</i>                      |
|             | <i>large vs. Controls</i> | <b>&lt;0.001</b>             | <b>&lt;0.001</b>               | <b>&lt;0.001</b>               | <b>&lt;0.001</b>                | <b>&lt;0.001</b>            | <b>&lt;0.001</b>             | <b>0.005</b>                     |
|             | <i>small vs. Controls</i> | <i>n.s.</i>                  | <b>0.035</b>                   | <b>0.004</b>                   | <i>n.s.</i>                     | <b>0.002</b>                | <i>n.s.</i>                  | <i>n.s.</i>                      |
|             |                           |                              |                                |                                |                                 |                             |                              |                                  |
| RDA<br>(°)  | large defects             | 55                           | 54                             | 51                             | 49                              | 48                          | 46                           | 43                               |
|             | small defects             | 53                           | 47                             | 47                             | 49                              | 44                          | 44                           | 37                               |
|             | controls                  | 46                           | 44                             | 45                             | 42                              | 42                          | 42                           | 40                               |
|             | <i>large vs. small</i>    | <i>n.s.</i>                  | <b>0.001</b>                   | <i>n.s.</i>                    | <i>n.s.</i>                     | <b>0.009</b>                | <i>n.s.</i>                  | <i>n.s.</i>                      |
|             | <i>large vs. controls</i> | <b>0.001</b>                 | <b>&lt;0.001</b>               | <b>0.008</b>                   | <b>0.007</b>                    | <b>0.001</b>                | <i>n.s.</i>                  | <i>n.s.</i>                      |
|             | <i>small vs. controls</i> | <b>0.038</b>                 | <i>n.s.</i>                    | <i>n.s.</i>                    | <b>0.034</b>                    | <i>n.s.</i>                 | <i>n.s.</i>                  | <i>n.s.</i>                      |
|             |                           |                              |                                |                                |                                 |                             |                              |                                  |
| LDD<br>(mm) | large defects             | 54                           | 61                             | 67                             | 75                              | 76                          | 87                           | 100                              |
|             | small defects             | 61                           | 64                             | 68                             | 80                              | 85                          | 100                          | 127                              |
|             | controls                  | 54                           | 63                             | 71                             | 77                              | 88                          | 91                           | 110                              |
|             | <i>large vs. small</i>    | <b>0.018</b>                 | <i>n.s.</i>                    | <i>n.s.</i>                    | <i>n.s.</i>                     | <b>0.001</b>                | <b>0.004</b>                 | <i>n.s.</i>                      |
|             | <i>large vs. controls</i> | <i>n.s.</i>                  | <i>n.s.</i>                    | <i>n.s.</i>                    | <i>n.s.</i>                     | <b>&lt;0.001</b>            | <i>n.s.</i>                  | <i>n.s.</i>                      |
|             | <i>small vs. controls</i> | <b>0.032</b>                 | <i>n.s.</i>                    | <i>n.s.</i>                    | <i>n.s.</i>                     | <i>n.s.</i>                 | <i>n.s.</i>                  | <i>n.s.</i>                      |
|             |                           |                              |                                |                                |                                 |                             |                              |                                  |
| RDD<br>(mm) | large defects             | 55                           | 62                             | 66                             | 76                              | 79                          | 95                           | 109                              |
|             | small defects             | 59                           | 67                             | 68                             | 77                              | 89                          | 97                           | 136                              |
|             | controls                  | 58                           | 64                             | 75                             | 78                              | 95                          | 95                           | 114                              |
|             | <i>large vs. small</i>    | <i>n.s.</i>                  | <i>n.s.</i>                    | <i>n.s.</i>                    | <i>n.s.</i>                     | <b>&lt;0.001</b>            | <i>n.s.</i>                  | <b>0.029</b>                     |
|             | <i>large vs. controls</i> | <i>n.s.</i>                  | <i>n.s.</i>                    | <b>&lt;0.001</b>               | <i>n.s.</i>                     | <b>&lt;0.001</b>            | <i>n.s.</i>                  | <i>n.s.</i>                      |
|             | <i>small vs. controls</i> | <i>n.s.</i>                  | <i>n.s.</i>                    | <b>0.018</b>                   | <i>n.s.</i>                     | <i>n.s.</i>                 | <i>n.s.</i>                  | <i>n.s.</i>                      |
|             |                           |                              |                                |                                |                                 |                             |                              |                                  |
| LDH<br>(mm) | large defects             | 12                           | 11                             | 11                             | 12                              | 12                          | 13                           | 12                               |
|             | small defects             | 8                            | 13                             | 12                             | 17                              | 15                          | 15                           | 24                               |
|             | controls                  | 9                            | 14                             | 15                             | 18                              | 21                          | 21                           | 26                               |
|             | <i>large vs. small</i>    | <b>0.01</b>                  | <i>n.s.</i>                    | <i>n.s.</i>                    | <b>0.036</b>                    | <i>n.s.</i>                 | <i>n.s.</i>                  | <b>0.045</b>                     |
|             | <i>large vs. controls</i> | <i>n.s.</i>                  | <b>0.026</b>                   | <i>n.s.</i>                    | <b>&lt;0.001</b>                | <b>&lt;0.001</b>            | <b>&lt;0.001</b>             | <b>&lt;0.001</b>                 |
|             | <i>small vs. controls</i> | <i>n.s.</i>                  | <i>n.s.</i>                    | <i>n.s.</i>                    | <i>n.s.</i>                     | <b>0.004</b>                | <b>0.008</b>                 | <i>n.s.</i>                      |
|             |                           |                              |                                |                                |                                 |                             |                              |                                  |
| RDH<br>(mm) | large defects             | 13                           | 15                             | 15                             | 17                              | 18                          | 21                           | 27                               |
|             | small defects             | 10                           | 15                             | 14                             | 15                              | 18                          | 19                           | 35                               |
|             | controls                  | 10                           | 14                             | 14                             | 18                              | 22                          | 23                           | 27                               |
|             | <i>large vs. small</i>    | <i>n.s.</i>                  | <i>n.s.</i>                    | <i>n.s.</i>                    | <i>n.s.</i>                     | <i>n.s.</i>                 | <i>n.s.</i>                  | <i>n.s.</i>                      |
|             | <i>large vs. controls</i> | <b>0.032</b>                 | <i>n.s.</i>                    | <i>n.s.</i>                    | <i>n.s.</i>                     | <i>n.s.</i>                 | <i>n.s.</i>                  | <i>n.s.</i>                      |
|             | <i>small vs. controls</i> | <i>n.s.</i>                  | <i>n.s.</i>                    | <i>n.s.</i>                    | <i>n.s.</i>                     | <i>n.s.</i>                 | <i>n.s.</i>                  | <i>n.s.</i>                      |
|             |                           |                              |                                |                                |                                 |                             |                              |                                  |
| LDCI        | large defects             | 5.1                          | 6.3                            | 7.3                            | 6.7                             | 7.4                         | 7.2                          | 11.4                             |
|             | small defects             | 8.4                          | 5.3                            | 6.0                            | 5.0                             | 6.7                         | 7.8                          | 7.0                              |
|             | controls                  | 5.9                          | 4.6                            | 5.0                            | 4.3                             | 4.5                         | 4.4                          | 4.4                              |

|                        |                           |                  |              |              |              |                  |              |              |
|------------------------|---------------------------|------------------|--------------|--------------|--------------|------------------|--------------|--------------|
|                        | <i>large vs. small</i>    | <b>&lt;0.001</b> | <i>n.s.</i>  | <i>n.s.</i>  | <i>n.s.</i>  | <i>n.s.</i>      | <i>n.s.</i>  | <i>n.s.</i>  |
|                        | <i>large vs. controls</i> | <i>n.s.</i>      | <b>0.025</b> | <b>0.046</b> | <b>0.014</b> | <b>0.047</b>     | <b>0.01</b>  | <i>n.s.</i>  |
|                        | <i>small vs. controls</i> | <b>0.006</b>     | <i>n.s.</i>  | <i>n.s.</i>  | <i>n.s.</i>  | <i>n.s.</i>      | <b>0.011</b> | <i>n.s.</i>  |
| RDCI                   | large defects             | 4.8              | 4.3          | 4.8          | 4.7          | 4.5              | 4.9          | 4.3          |
|                        | small defects             | 6.2              | 4.6          | 5.0          | 5.3          | 5.3              | 5.3          | 4.2          |
|                        | controls                  | 6.1              | 4.8          | 5.3          | 4.5          | 4.6              | 4.2          | 4.3          |
|                        | <i>large vs. small</i>    | <i>n.s.</i>      | <i>n.s.</i>  | <i>n.s.</i>  | <i>n.s.</i>  | <i>n.s.</i>      | <i>n.s.</i>  | <i>n.s.</i>  |
|                        | <i>large vs. controls</i> | <i>n.s.</i>      | <i>n.s.</i>  | <i>n.s.</i>  | <i>n.s.</i>  | <i>n.s.</i>      | <i>n.s.</i>  | <i>n.s.</i>  |
|                        | <i>small vs. controls</i> | <i>n.s.</i>      | <i>n.s.</i>  | <i>n.s.</i>  | <i>n.s.</i>  | <i>n.s.</i>      | <i>n.s.</i>  | <i>n.s.</i>  |
|                        | large defects             | 50               | 56           | 62           | 67           | 69               | 78           | 89           |
|                        | small defects             | 54               | 60           | 65           | 74           | 80               | 91           | 125          |
|                        | controls                  | 51               | 61           | 67           | 75           | 84               | 88           | 108          |
| LLLD (mm)              | <i>large vs. small</i>    | <i>n.s.</i>      | <i>n.s.</i>  | <i>n.s.</i>  | 0.057        | <b>&lt;0.001</b> | <b>0.007</b> | <b>0.001</b> |
|                        | <i>large vs. controls</i> | <i>n.s.</i>      | <i>n.s.</i>  | <i>n.s.</i>  | <b>0.019</b> | <b>&lt;0.001</b> | <b>0.027</b> | <b>0.002</b> |
|                        | <i>small vs. controls</i> | <i>n.s.</i>      | <i>n.s.</i>  | <i>n.s.</i>  | <i>n.s.</i>  | <i>n.s.</i>      | <i>n.s.</i>  | <i>n.s.</i>  |
|                        | large defects             | 53               | 59           | 64           | 73           | 77               | 91           | 107          |
|                        | small defects             | 55               | 62           | 65           | 75           | 85               | 96           | 134          |
|                        | controls                  | 55               | 59           | 70           | 74           | 87               | 91           | 109          |
|                        | <i>large vs. small</i>    | <i>n.s.</i>      | <i>n.s.</i>  | <i>n.s.</i>  | <i>n.s.</i>  | <b>0.002</b>     | <i>n.s.</i>  | <b>0.017</b> |
|                        | <i>large vs. controls</i> | <i>n.s.</i>      | <i>n.s.</i>  | <b>0.006</b> | <i>n.s.</i>  | <b>0.001</b>     | <i>n.s.</i>  | <i>n.s.</i>  |
|                        | <i>small vs. controls</i> | <i>n.s.</i>      | <i>n.s.</i>  | <i>n.s.</i>  | <i>n.s.</i>  | <i>n.s.</i>      | <i>n.s.</i>  | <b>0.036</b> |
| RLLD (mm)              | large defects             | 1,780            | 2,265        | 3,088        | 4,483        | 5,855            | 9,572        | 14,836       |
|                        | small defects             | 1,990            | 2,805        | 3,241        | 5,312        | 7,552            | 12,294       | 24,534       |
|                        | controls                  | 1,830            | 2,236        | 3,008        | 4,531        | 7,084            | 8,388        | 15,464       |
|                        | <i>large vs. small</i>    | <i>n.s.</i>      | <i>n.s.</i>  | <i>n.s.</i>  | <i>n.s.</i>  | <b>&lt;0.001</b> | 0.05         | <b>0.015</b> |
|                        | <i>large vs. controls</i> | <i>n.s.</i>      | <i>n.s.</i>  | <i>n.s.</i>  | <i>n.s.</i>  | <b>0.045</b>     | <i>n.s.</i>  | <i>n.s.</i>  |
|                        | <i>small vs. controls</i> | <i>n.s.</i>      | <i>n.s.</i>  | <i>n.s.</i>  | <i>n.s.</i>  | <i>n.s.</i>      | <b>0.015</b> | <b>0.031</b> |
|                        | large defects             | 2,658            | 3,284        | 4,515        | 6,086        | 8,225            | 12,820       | 19,247       |
|                        | small defects             | 2,712            | 3,663        | 4,681        | 6,267        | 9,174            | 13,075       | 24,228       |
|                        | controls                  | 2,297            | 3,236        | 3,806        | 5,828        | 8,350            | 10,051       | 17,531       |
| LTA (mm <sup>2</sup> ) | <i>large vs. small</i>    | <i>n.s.</i>      | <i>n.s.</i>  | <i>n.s.</i>  | <i>n.s.</i>  | <i>n.s.</i>      | <i>n.s.</i>  | <i>n.s.</i>  |
|                        | <i>large vs. controls</i> | <i>n.s.</i>      | <i>n.s.</i>  | <i>n.s.</i>  | <i>n.s.</i>  | <i>n.s.</i>      | <b>0.034</b> | <i>n.s.</i>  |
|                        | <i>small vs. controls</i> | <i>n.s.</i>      | <i>n.s.</i>  | <i>n.s.</i>  | <i>n.s.</i>  | <i>n.s.</i>      | <i>n.s.</i>  | <i>n.s.</i>  |
|                        | large defects             | 2,658            | 3,284        | 4,515        | 6,086        | 8,225            | 12,820       | 19,247       |
|                        | small defects             | 2,712            | 3,663        | 4,681        | 6,267        | 9,174            | 13,075       | 24,228       |
|                        | controls                  | 2,297            | 3,236        | 3,806        | 5,828        | 8,350            | 10,051       | 17,531       |
|                        | <i>large vs. small</i>    | <i>n.s.</i>      | <i>n.s.</i>  | <i>n.s.</i>  | <i>n.s.</i>  | <i>n.s.</i>      | <i>n.s.</i>  | <i>n.s.</i>  |
|                        | <i>large vs. controls</i> | <i>n.s.</i>      | <i>n.s.</i>  | <i>n.s.</i>  | <i>n.s.</i>  | <i>n.s.</i>      | <b>0.034</b> | <i>n.s.</i>  |
|                        | <i>small vs. controls</i> | <i>n.s.</i>      | <i>n.s.</i>  | <i>n.s.</i>  | <i>n.s.</i>  | <i>n.s.</i>      | <i>n.s.</i>  | <i>n.s.</i>  |
| RTA (mm <sup>2</sup> ) | large defects             | 2,658            | 3,284        | 4,515        | 6,086        | 8,225            | 12,820       | 19,247       |
|                        | small defects             | 2,712            | 3,663        | 4,681        | 6,267        | 9,174            | 13,075       | 24,228       |
|                        | controls                  | 2,297            | 3,236        | 3,806        | 5,828        | 8,350            | 10,051       | 17,531       |
|                        | <i>large vs. small</i>    | <i>n.s.</i>      | <i>n.s.</i>  | <i>n.s.</i>  | <i>n.s.</i>  | <i>n.s.</i>      | <i>n.s.</i>  | <i>n.s.</i>  |
|                        | <i>large vs. controls</i> | <i>n.s.</i>      | <i>n.s.</i>  | <i>n.s.</i>  | <i>n.s.</i>  | <i>n.s.</i>      | <b>0.034</b> | <i>n.s.</i>  |
|                        | <i>small vs. controls</i> | <i>n.s.</i>      | <i>n.s.</i>  | <i>n.s.</i>  | <i>n.s.</i>  | <i>n.s.</i>      | <i>n.s.</i>  | <i>n.s.</i>  |
|                        | large defects             | 2,658            | 3,284        | 4,515        | 6,086        | 8,225            | 12,820       | 19,247       |
|                        | small defects             | 2,712            | 3,663        | 4,681        | 6,267        | 9,174            | 13,075       | 24,228       |
|                        | controls                  | 2,297            | 3,236        | 3,806        | 5,828        | 8,350            | 10,051       | 17,531       |

**Table S1:** Mean values of geometric variables of the diaphragm and thorax in 89 patients with left-sided congenital diaphragmatic hernia during a mean long-term follow-up of 8.2 years at 6 ± 2 months, 12 ± 2 months, 24 ± 4 months, 3.5 ± 0.5 years, 6 ± 1 year, 10 ± 2 years and 15.5 ± 2.5 years of age: left diaphragmatic angle (LDA), right diaphragmatic angle (RDA), left diaphragmatic diameter (LDD), right diaphragmatic diameter (RDD), left diaphragmatic height (LDH), right diaphragmatic height (RDH), left diaphragmatic curvature index (LDCI), right diaphragmatic curvature index (RDCI), left diaphragmatic curvature index (LDCI), left lower lung diameter (LLLD), right lower lung diameter (RLLD), left thoracic area (LTA), right thoracic area (RTA); numbers in brackets indicate the number of patients of which data was available at the respective time point during follow-up. Italic numbers indicate p-values; bold numbers indicate p values < 0.05; n.s., not significant; °, angle in degree; mm, millimeter; mm<sup>2</sup>, square millimeter;

|                        |                          | LDA<br>(°) | RDA<br>(°)   | LDD<br>(mm) | RDD<br>(mm)  | LDH<br>(mm) | RDH<br>(mm) | LDCI         | RDCI | LLLD<br>(mm) | RLLD<br>(mm) | LTA<br>(mm <sup>2</sup> ) | RTA<br>(mm <sup>2</sup> ) | TTA<br>(mm <sup>2</sup> ) |
|------------------------|--------------------------|------------|--------------|-------------|--------------|-------------|-------------|--------------|------|--------------|--------------|---------------------------|---------------------------|---------------------------|
| 6 ± 2<br>months        | recurrence<br>(3)        | 25         | 54           | 53          | 54           | 14          | 14          | 3.9          | 4.5  | 50           | 51           | 1,753                     | 3,077                     | 4,829                     |
|                        | no<br>recurrence<br>(25) | 33         | 54           | 57          | 56           | 10          | 12          | 6.5          | 5.4  | 52           | 54           | 1,869                     | 2,642                     | 4,315                     |
|                        | p                        | n.s.       | n.s.         | n.s.        | n.s.         | n.s.        | n.s.        | <b>0.045</b> | n.s. | n.s.         | n.s.         | n.s.                      | n.s.                      | n.s.                      |
| 12 ± 2<br>months       | recurrence<br>(5)        | 29         | 53           | 65          | 59           | 11          | 15          | 6.5          | 4.1  | 60           | 57           | 2,303                     | 3,401                     | 5,704                     |
|                        | no<br>recurrence<br>(30) | 30         | 51           | 62          | 65           | 12          | 15          | 5.8          | 4.5  | 58           | 61           | 2,501                     | 3,433                     | 5,934                     |
|                        | p                        | n.s.       | n.s.         | n.s.        | n.s.         | n.s.        | n.s.        | n.s.         | n.s. | n.s.         | n.s.         | n.s.                      | n.s.                      | n.s.                      |
| 24 ± 4<br>months       | recurrence<br>(3)        | 25         | 55           | 70          | 66           | 12          | 19          | 6.5          | 3.6  | 64           | 62           | 3,006                     | 4,721                     | 7,728                     |
|                        | no<br>recurrence<br>(37) | 32         | 49           | 67          | 67           | 12          | 14          | 6.5          | 5.0  | 63           | 64           | 3,185                     | 4,573                     | 7,758                     |
|                        | p                        | n.s.       | n.s.         | n.s.        | n.s.         | n.s.        | <b>0.01</b> | n.s.         | n.s. | n.s.         | n.s.         | n.s.                      | n.s.                      | n.s.                      |
| 3.5 ± 0.5<br>years     | recurrence<br>(1)        | 28         | 53           | 71          | 74           | 10          | 19          | 7.1          | 3.9  | 60           | 68           | 2,741                     | 3,932                     | 6,673                     |
|                        | no<br>recurrence<br>(23) | 30         | 49           | 76          | 77           | 14          | 17          | 6.2          | 4.8  | 69           | 74           | 4,713                     | 6,132                     | 10,845                    |
|                        | p                        | n.s.       | n.s.         | n.s.        | n.s.         | n.s.        | n.s.        | n.s.         | n.s. | n.s.         | n.s.         | n.s.                      | n.s.                      | <b>0.037</b>              |
| 6 ± 1<br>year          | recurrence<br>(2)        | 28         | 52           | 72          | 70           | 9           | 17          | 8.4          | 4.0  | 67           | 66           | 3,669                     | 6,065                     | 9,734                     |
|                        | no<br>recurrence<br>(48) | 31         | 46           | 80          | 83           | 13          | 18          | 7.0          | 4.9  | 73           | 81           | 6,593                     | 8,636                     | 15,050                    |
|                        | p                        | n.s.       | n.s.         | n.s.        | <b>0.022</b> | <b>n.s.</b> | n.s.        | <b>n.s.</b>  | n.s. | n.s.         | <b>0.004</b> | <b>0.009</b>              | <b>0.018</b>              | <b>0.015</b>              |
| 10 ± 2<br>years        | recurrence<br>(1)        | 30         | 52           | 83          | 83           | 12          | 15          | 7.2          | 5.7  | 73           | 83           | 8,364                     | 13,175                    | 21,538                    |
|                        | no<br>recurrence<br>(31) | 32         | 45           | 90          | 95           | 13          | 20          | 7.3          | 5.1  | 81           | 92           | 10,103                    | 12,684                    | 22,787                    |
|                        | p                        | n.s.       | n.s.         | n.s.        | n.s.         | n.s.        | n.s.        | n.s.         | n.s. | n.s.         | n.s.         | n.s.                      | n.s.                      | n.s.                      |
| 15.5 ±<br>2.5<br>years | recurrence<br>(3)        | 35         | 50           | 99          | 97           | 8           | 24          | 23           | 4.1  | 86           | 96           | 11,224                    | 13,643                    | 24,868                    |
|                        | no<br>recurrence<br>(16) | 33         | 42           | 105         | 113          | 13          | 28          | 9.4          | 4.3  | 93           | 112          | 16,768                    | 20,765                    | 37,533                    |
|                        | p                        | n.s.       | <b>0.013</b> | n.s.        | n.s.         | n.s.        | n.s.        | n.s.         | n.s. | n.s.         | n.s.         | n.s.                      | <b>0.017</b>              | <b>0.041</b>              |

**Table S2:** Mean values of geometric variables of the diaphragm and thorax in 89 patients with left-sided congenital diaphragmatic hernia with and without recurrence during a mean long-term follow-up of 8.2 years at 6 ± 2 months, 12 ± 2 months, 24 ± 4 months, 3.5 ± 0.5 years, 6 ± 1 year, 10 ± 2 years and 15.5 ± 2.5 years of age: left diaphragmatic angle (LDA), right diaphragmatic angle (RDA), left diaphragmatic diameter (LDD), right diaphragmatic diameter (RDD), left diaphragmatic height (LDH), right diaphragmatic height (RDH), left diaphragmatic curvature index (LDCI), right diaphragmatic curvature index (RDCI), left diaphragmatic curvature index (LDCI), left lower lung diameter (LLLD), right lower lung diameter (RLLD), left thoracic area (LTA), right thoracic area (RTA) and total thoracic area (TTA); numbers in brackets indicate the number of patients of which data was available at the respective time point during follow-up. Bold numbers indicate p values < 0.05; n.s., not significant; °, angle in degree; mm, millimeter; mm<sup>2</sup>, square millimeter;

|                    |                            | LDA<br>(°) | RDA<br>(°) | LDD<br>(mm)  | RDD<br>(mm) | LDH<br>(mm) | RDH<br>(mm) | LDCI         | RDCI | LLLD<br>(mm) | RLLD<br>(mm) | LTA<br>(mm <sup>2</sup> ) | RTA<br>(mm <sup>2</sup> ) | TTA<br>(mm <sup>2</sup> ) |
|--------------------|----------------------------|------------|------------|--------------|-------------|-------------|-------------|--------------|------|--------------|--------------|---------------------------|---------------------------|---------------------------|
| 6 ± 2<br>months    | scoliotic curve<br>(6)     | 30         | 56         | 51           | 53          | 11          | 12          | 5.3          | 5.2  | 46           | 51           | 1,577                     | 2,718                     | 4,296                     |
|                    | no scoliotic curve<br>(12) | 35         | 53         | 59           | 57          | 9           | 10          | 7.4          | 5.8  | 54           | 54           | 2,013                     | 2,693                     | 4,706                     |
|                    | P                          | n.s.       | n.s.       | <b>0.011</b> | n.s.        | n.s.        | n.s.        | n.s.         | n.s. | <b>0.004</b> | n.s.         | n.s.                      | n.s.                      | n.s.                      |
| 12 ± 2<br>months   | scoliotic curve<br>(10)    | 31         | 53         | 61           | 60          | 10          | 14          | 6.5          | 4.5  | 56           | 58           | 2,047                     | 3,296                     | 5,343                     |
|                    | no scoliotic curve<br>(15) | 32         | 49         | 63           | 65          | 12          | 14          | 5.6          | 4.6  | 59           | 61           | 2,545                     | 3,449                     | 5,994                     |
|                    | P                          | n.s.       | n.s.       | n.s.         | n.s.        | n.s.        | n.s.        | n.s.         | n.s. | n.s.         | n.s.         | n.s.                      | n.s.                      | n.s.                      |
| 24 ± 4<br>months   | scoliotic curve<br>(8)     | 29         | 49         | 66           | 67          | 11          | 15          | 6.7          | 4.9  | 62           | 63           | 3,149                     | 4,610                     | 7,759                     |
|                    | no scoliotic curve<br>(21) | 32         | 48         | 68           | 67          | 12          | 14          | 6.6          | 4.8  | 64           | 65           | 3,132                     | 4,627                     | 7,759                     |
|                    | P                          | n.s.       | n.s.       | n.s.         | n.s.        | n.s.        | n.s.        | n.s.         | n.s. | n.s.         | n.s.         | n.s.                      | n.s.                      | n.s.                      |
| 3.5 ± 0.5<br>years | scoliotic curve<br>(10)    | 32         | 49         | 75           | 77          | 11          | 18          | 7.9          | 4.8  | 66           | 72           | 4,405                     | 6,240                     | 10,645                    |
|                    | no scoliotic curve<br>(8)  | 28         | 46         | 79           | 76          | 15          | 16          | 5.3          | 5    | 69           | 76           | 5,402                     | 6,325                     | 11,726                    |
|                    | P                          | n.s.       | n.s.       | n.s.         | n.s.        | <b>0.01</b> | n.s.        | <b>0.045</b> | n.s. | n.s.         | <b>0.049</b> | n.s.                      | n.s.                      | n.s.                      |
| 6 ± 1<br>year      | scoliotic curve<br>(16)    | 30         | 49         | 79           | 81          | 13          | 18          | 6.7          | 4.8  | 72           | 79           | 5,696                     | 8,032                     | 13,226                    |
|                    | no scoliotic curve<br>(29) | 30         | 46         | 82           | 84          | 14          | 18          | 6.7          | 4.9  | 75           | 81           | 7,077                     | 8,883                     | 15,960                    |
|                    | P                          | n.s.       | n.s.       | n.s.         | n.s.        | n.s.        | n.s.        | n.s.         | n.s. | n.s.         | n.s.         | <b>0.005</b>              | n.s.                      | <b>0.004</b>              |

**Table S3:** Mean values of geometric variables of the diaphragm and thorax in 57 patients with left-sided congenital diaphragmatic hernia with and without scoliotic curves of the spine above the age of 8 years during early long-term follow-up at 6 ± 2 months, 12 ± 2 months, 24 ± 4 months, 3.5 ± 0.5 years and 6 ± 1 year: left diaphragmatic angle (LDA), right diaphragmatic angle (RDA), left diaphragmatic diameter (LDD), right diaphragmatic diameter (RDD), left diaphragmatic height (LDH), right diaphragmatic height (RDH), left diaphragmatic curvature index (LDCI), right diaphragmatic curvature index (RDCI), left lower lung diameter (LLLD), right lower lung diameter (RLLD), left thoracic area (LTA), right thoracic area (RTA) and total thoracic area (TTA); numbers in brackets indicate the number of patients of which data was available at the respective time point during follow-up. Bold numbers indicate p values < 0.05; n.s., not significant; °, angle in degree; mm, millimeter; mm<sup>2</sup>, square millimeter;

|                    |                                    | LDA<br>(°) | RDA<br>(°)    | LDD<br>(mm)  | RDD<br>(mm)   | LDH<br>(mm)   | RDH<br>(mm) | LDCI | RDCI | LLLD<br>(mm)  | RLLD<br>(mm)  |
|--------------------|------------------------------------|------------|---------------|--------------|---------------|---------------|-------------|------|------|---------------|---------------|
| 6 ± 2<br>months    | reduced<br>thoracic area<br>(10)   | 33         | 56            | 53           | 49            | 8             | 11          | 7    | 4.7  | 49            | 48            |
|                    | no reduced<br>thoracic area<br>(5) | 35         | 53            | 58           | 61            | 11            | 11          | 5.5  | 6.2  | 53            | 57            |
|                    | P                                  | n.s.       | n.s.          | n.s.         | <b>0.0026</b> | <b>0.0196</b> | n.s.        | n.s. | n.s. | n.s.          | <b>0.0039</b> |
| 12 ± 2<br>months   | reduced<br>thoracic area<br>(13)   | 28         | 59            | 62           | 59            | 10            | 14          | 6.5  | 4.2  | 57            | 56            |
|                    | no reduced<br>thoracic area<br>(4) | 30         | 50            | 64           | 63            | 12            | 14          | 6.0  | 4.7  | 58            | 59            |
|                    | P                                  | n.s.       | <b>0.0142</b> | n.s.         | n.s.          | n.s.          | n.s.        | n.s. | n.s. | n.s.          | n.s.          |
| 24 ± 4<br>months   | reduced<br>thoracic area<br>(12)   | 25         | 52            | 62           | 63            | 11            | 15          | 6.1  | 4.3  | 58            | 60            |
|                    | no reduced<br>thoracic area<br>(5) | 32         | 48            | 68           | 68            | 12            | 14          | 6.5  | 5.1  | 63            | 66            |
|                    | P                                  | n.s.       | n.s.          | <b>0.038</b> | n.s.          | n.s.          | n.s.        | n.s. | n.s. | <b>0.0428</b> | <b>0.0498</b> |
| 3.5 ± 0.5<br>years | reduced<br>thoracic area<br>(13)   | 30         | 48            | 79           | 78            | 11            | 22          | 8.4  | 3.6  | 73            | 70            |
|                    | no reduced<br>thoracic area<br>(2) | 30         | 48            | 75           | 76            | 14            | 16          | 6.2  | 5.1  | 67            | 75            |
|                    | P                                  | n.s.       | n.s.          | n.s.         | n.s.          | n.s.          | n.s.        | n.s. | n.s. | n.s.          | n.s.          |
| 6 ± 1<br>year      | reduced<br>thoracic area<br>(19)   | 27         | 50            | 78           | 79            | 14            | 19          | 5.9  | 4.4  | 70            | 77            |
|                    | no reduced<br>thoracic area<br>(7) | 28         | 47            | 79           | 80            | 13            | 17          | 6.9  | 5.1  | 71            | 78            |
|                    | P                                  | n.s.       | n.s.          | n.s.         | n.s.          | n.s.          | n.s.        | n.s. | n.s. | n.s.          | n.s.          |

**Table S4:** Mean values of geometric variables of the diaphragm and thorax during early long-term follow-up at 6 ± 2 months, 12 ± 2 months, 24 ± 4 months, 3.5 ± 0.5 years and 6 ± 1 year in 36 patients with left-sided congenital diaphragmatic hernia with a total thoracic area greater and smaller than the median total thoracic area (20,025mm<sup>2</sup>) of the control group at the age of 10 ± 2 years: left diaphragmatic angle (LDA), right diaphragmatic angle (RDA), left diaphragmatic diameter (LDD), right diaphragmatic diameter (RDD), left diaphragmatic height (LDH), right diaphragmatic height (RDH), left diaphragmatic curvature index (LDCI), right diaphragmatic curvature index (RDCI), left lower lung diameter (LLLD) and right lower lung diameter (RLLD); numbers in brackets indicate the number of patients of which data was available at the respective time point during follow-up. Bold numbers indicate p values < 0.05; n.s., not significant; °, angle in degree; mm, millimeter; mm<sup>2</sup>, square millimeter;
